# Supplementary material
Source: PubMed Central journal article supplement (PMC290271)
Supplement: nar_31_23_6700__1.pdf [file nar_31_23_6700__1.pdf]

## Supplementary Material

Sequences of oligodeoxyribonucleotides used in this paper:

pKQ-AfERS.N: d(GGAGAGAAGACTACATGAAAGAAGTCATAATGAAATAC)

pKQ/pBAD-AfERS.C: d(CGTTAGAAGACTGAATTCGGATTTTGGTCACGGGTGCG)

pKQ-ApERS.N: d(GCTATCACACCATGGCGATGCTCCTAGGGGACCATC)

pKQ-ApERS.C: d(GATCAGTCAGAATTCTTACTTGTGTGTATATCACCTG)

pKQ-MjERS.N: d(GGAGACGTCTCACATGGAAGAGAAGATATTGCC)

pKQ-MjERS.C: d(CGTTACGTCTCGAATTTTATCTATGTGCATAGCAAC)

pKQ-MmERS.N: d(GGAGACGTCTCACATGACCTTAAGTCCTGAAGA)

pKQ/pBAD-MmERS.C: d(CGTTACGTCTCGAATTTTATTTATGAGCAAAGTACGCCACGAC)

pKQ-MtERS.N: d(GGAGACGTCTCTCATGGTGCCAGTGGAGGACCT)

pKQ/pBAD-MtERS.C: d(CGTTACGTCTCTAATTTTATTTGTGGGCATAGTAGAAG)

pKQ-PhERS.N: d(GGAAAGGTCTCTCATGGATGTGGAAAAGATAGC)

pKQ/pBAD-PhERS.C: d(GAGTAGGTCTCTAATTTTACTTGTGAGCATATATTG)

pKQ-SsERS.N: d(GCTACTGCACCATGGAATTAATGAATTACGAGAAC)

pKQ-SsERS.C: d(GACTCAGTAGAATTCATTAGTCGTGTGAGAATACAACA)

AEGU-tRNA.F: d(CGGAATTCGCCCCGGTGGTGTAGCCCGGCCAAGCATGCGGGCCTCTAA)

AEGU-RNA.R: d(AAACTGCAGTGGTGTAGCCCGGCCGGGATTTGAACCCGGGTGCGGGCTTTAG  
AGGCCCGCATGCTTGG)

AQGU-RNA.F: d(CGGAATTCAGCCCCGTGGTGTAGCGGCCAAGCATGCGGGGCTCTAAACCC  
GCGACCG)

AQGU-RNA.R: d(AAACTGCAGTGGTGTAGCCCGCGGGGATTCGAACCCCGGTGCGGGGTTTAG  
AGCC)

AQGC-RNA.F: d(CGGAATTCAGCCCCGTGGTGTAGCGGCCAAGCACGCGGGGCTCTAAACCC  
GCGACCG)

AQGC-RNA.R: d(AAACTGCAGTGGTGTAGCCCGCGGGGATTCGAACCCCGGTGCGGGGTTTAG  
AGCC)

AENN-RNA.F: d(CGGAATTCGCCCCGGTGTGTAGCCCGGCCAAGCANGCGGGCCTCTAA)

pAC-tRNA.F: d(GGACAGCGGTGCGGACTG)

pAC-tRNA.R: d(GTGCTCAACGGCCTCAAC)

pBAD-EcERS.N: d(AGGCTTTTAACCATGGCAAAAATCAAAACTCGCTTCGC)

pBAD-EcERS.C: d(ACGTGAGAGGAATTCTGCTGATTTTCGCGTTCA)

pBAD-AfERS.C: d(CGTTAGAAGACTGAATTGGGGTGAGTGTACACCGCGACCAGTTCCTCG)

pBAD-MmERS.C: d(CGTTACGTCTCGAATTCTTATGAGCAAAGTACGCCACGAC)

pBAD-MtERS.C: d(CGTTACGTCTCTAATTTTTGTGGGCATAGTAGAAGACC)

pBAD-PhERS.C: d(GAGTAGGTCTCTAATTCTTGTGAGCATATATTGCGATAA)
